# Supplementary material for: Entrainment of mouse peripheral circadian clocks to <24 h feeding/fasting cycles under 24 h light/dark conditions
Source: PubMed Central journal article supplement (PMC4585804; doi:10.1038/srep14207), 2015-09-23
Supplement: srep14207-s1.pdf [file srep14207-s1.pdf]

## **Supplementary information**

### **Entrainment of mouse peripheral circadian clocks to <24 h feeding/fasting cycles under 24 h light/dark conditions**

Yutaro Hamaguchi<sup>1,2</sup>, Yu Tahara<sup>1,2</sup>, Hiroaki Kuroda<sup>1</sup>, Atsushi Haraguchi<sup>1</sup>, and Shigenobu Shibata<sup>1\*</sup>

<sup>1</sup>Laboratory of Physiology and Pharmacology, School of Advanced Science and Engineering, Waseda University, Tokyo, Japan

<sup>2</sup>These authors contributed equally to this work.

#### **\*Correspondence and proofs should be sent to:**

Shigenobu Shibata

Laboratory of Physiology and Pharmacology, School of Advanced Science and Engineering,

Waseda University, Wakamatsu-cho 2-2, Shinjuku-ku, Tokyo 162-8480, Japan

Telephone: +81-3-5369-7318; Fax: +81-3-3341-9815; E-mail: shibatas@waseda.jp

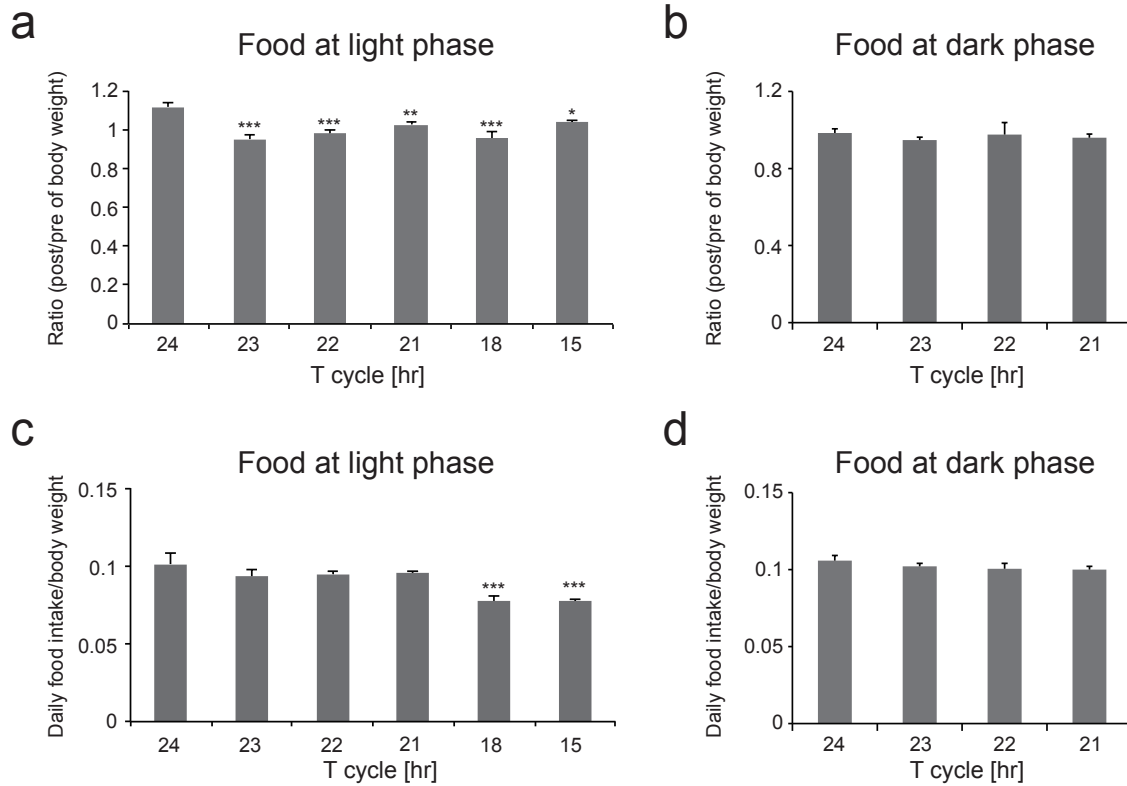

**Figure S1. Body weight change and food intake in each experiment, related to Fig. 2 and 3**

(a, b) Change in body weight after each T-cycle condition. Body weight was measured on the first day of each T-cycle (pre) and on the day of bioluminescence measurement (post). Body weight on the starting day was set as 1. (c, d) Daily food intake/body weight during each T-cycle condition.

Data are shown as mean  $\pm$  s.e.m. \*P < 0.05, \*\*P < 0.01, \*\*\*P < 0.001, vs. T = 24 h by Dunnett test.

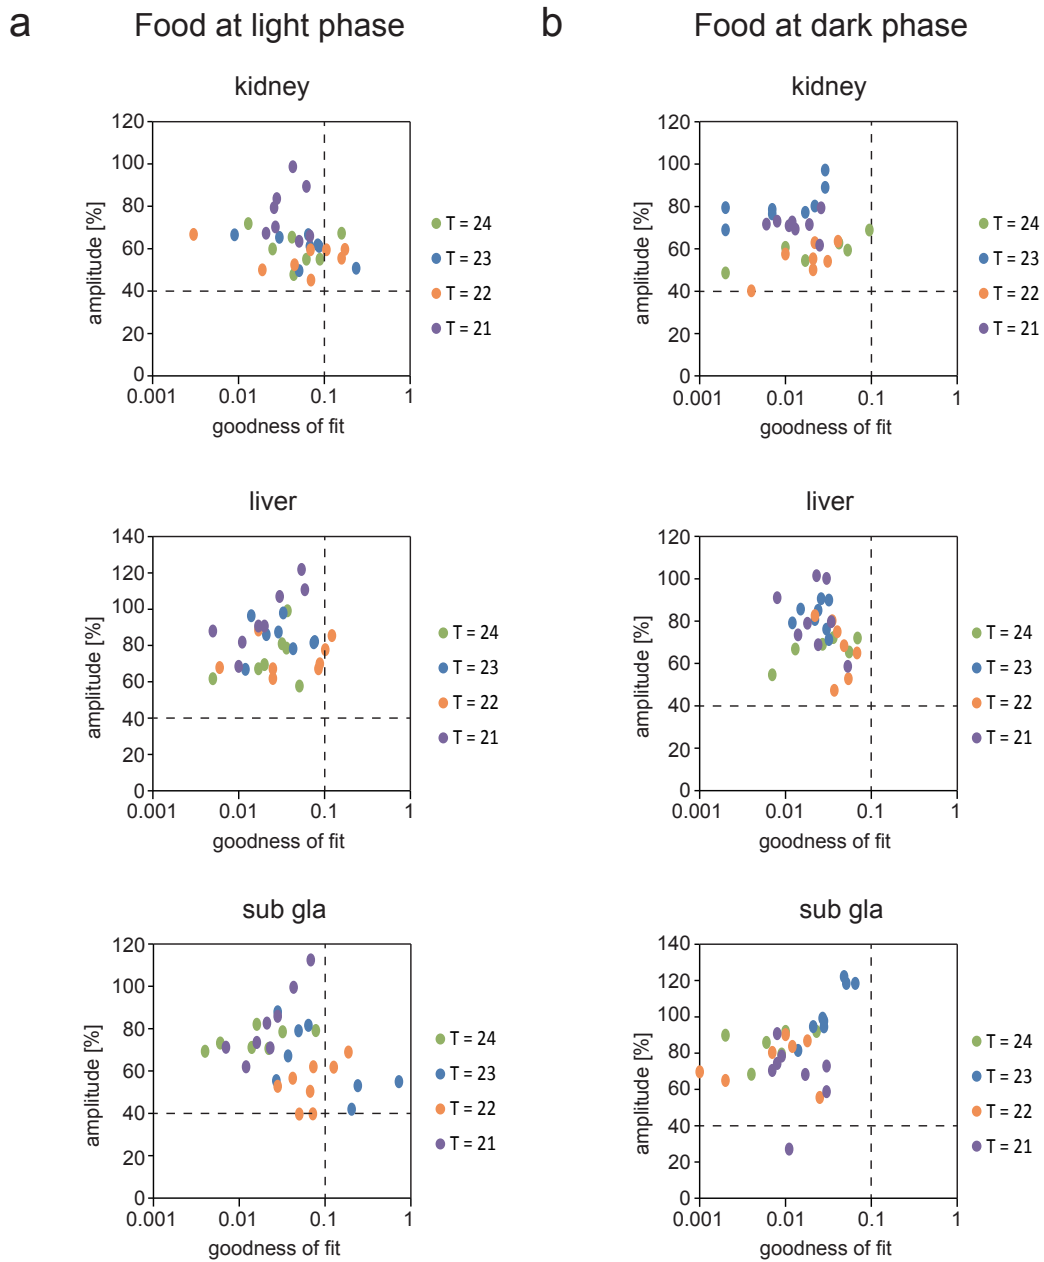

**Figure S2. Correlation map of amplitude and goodness of fit value of PER2::LUC rhythms, related to Fig. 2**

Correlation map of amplitude and goodness of fit in each tissue of T = 21–24 h condition with food intake during light phase (a) and dark phase (b) analysed by cosine curve fitting software (acro.exe). Each plot indicates the data of each mouse tissue. PER2::LUC rhythm with high amplitude (>40%) and low goodness of fit value (<0.1) was defined as “rhythmic” (Tahara et al., 2012).

**Table S1. Number of mice examined and tissues that met (passed) rhythmicity criteria in each experimental group**

| T-cycle (hr) | feeding time | number of mice | number of tissue samples (pass/total) |       |         |
|--------------|--------------|----------------|---------------------------------------|-------|---------|
|              |              |                | kidney                                | kiver | sub gla |
| T = 24       | light phase  | 7              | 6/7                                   | 7/7   | 7/7     |
|              | dark phase   | 6              | 6/6                                   | 6/6   | 6/6     |
| T = 23       | light phase  | 8              | 7/8                                   | 8/8   | 5/8     |
|              | dark phase   | 8              | 8/8                                   | 8/8   | 8/8     |
| T = 22       | light phase  | 8              | 5/8                                   | 6/8   | 4/8     |
|              | dark phase   | 7              | 7/7                                   | 7/7   | 7/7     |
| T = 21       | light phase  | 8              | 8/8                                   | 8/8   | 8/8     |
|              | dark phase   | 8              | 8/8                                   | 8/8   | 7/8     |

Cosinor analysis was performed for PER2::LUC bioluminescence. PER2::LUC rhythms with an amplitude of >40% and a goodness of fit value of <0.1 were defined as “rhythmic”.
